# Supplementary material
Source: Springer Nature journal article supplement (https://www.springermedizin.de/resource/supplementary/12889_2012_5389_MOESM2_ESM.pdf/9495288)

(in Natural log scale) mortality rate Per 1000

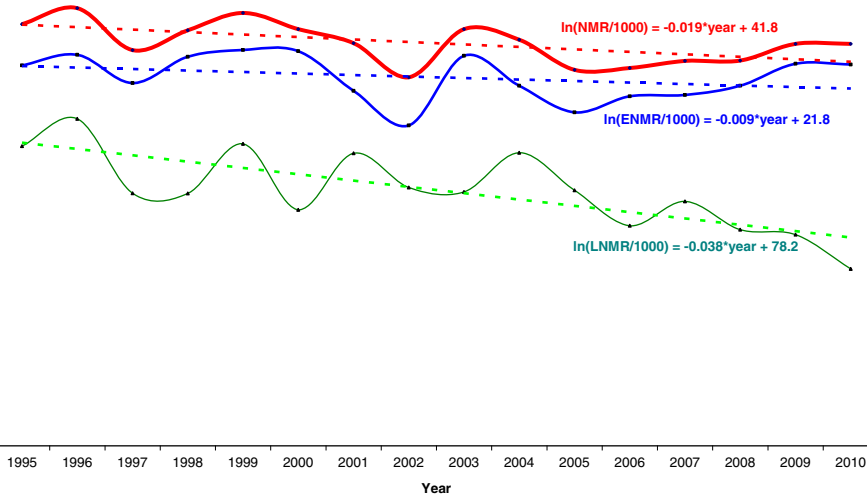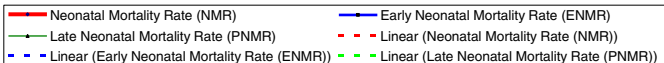

Supplement: MOESM2 [file 9495288]
